# Supplementary material
Source: PubMed Central journal article supplement (PMC6248788)
Supplement: supplementary_materials.pdf [file supplementary_materials.pdf]

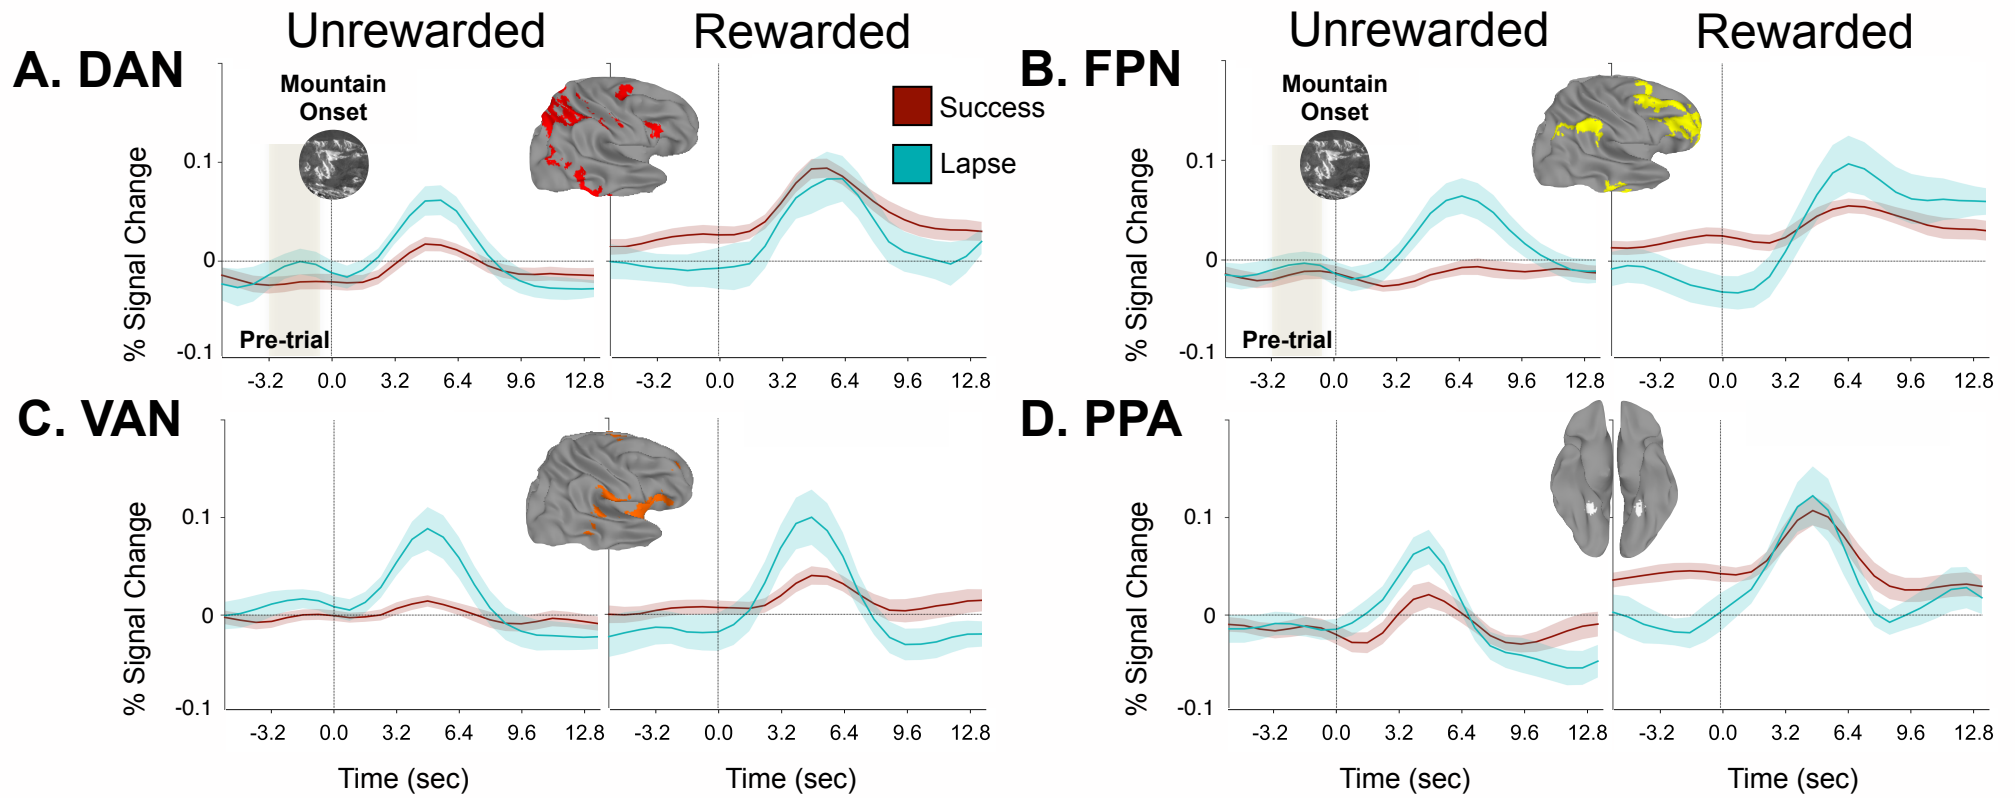

**Supplementary Figure 1.** Event-related averages associated with successes (maroon) and lapses (blue) during target mountain trials during unrewarded and rewarded blocks. Time courses are expressed as percentage signal change from the mean and were averaged across individuals and voxels in task-positive ROIs which include (A) Dorsal attention network/DAN (B) Frontal-parietal network/FPN (C) Ventral attention network/VAN (D) Parahippocampal place area/PPA

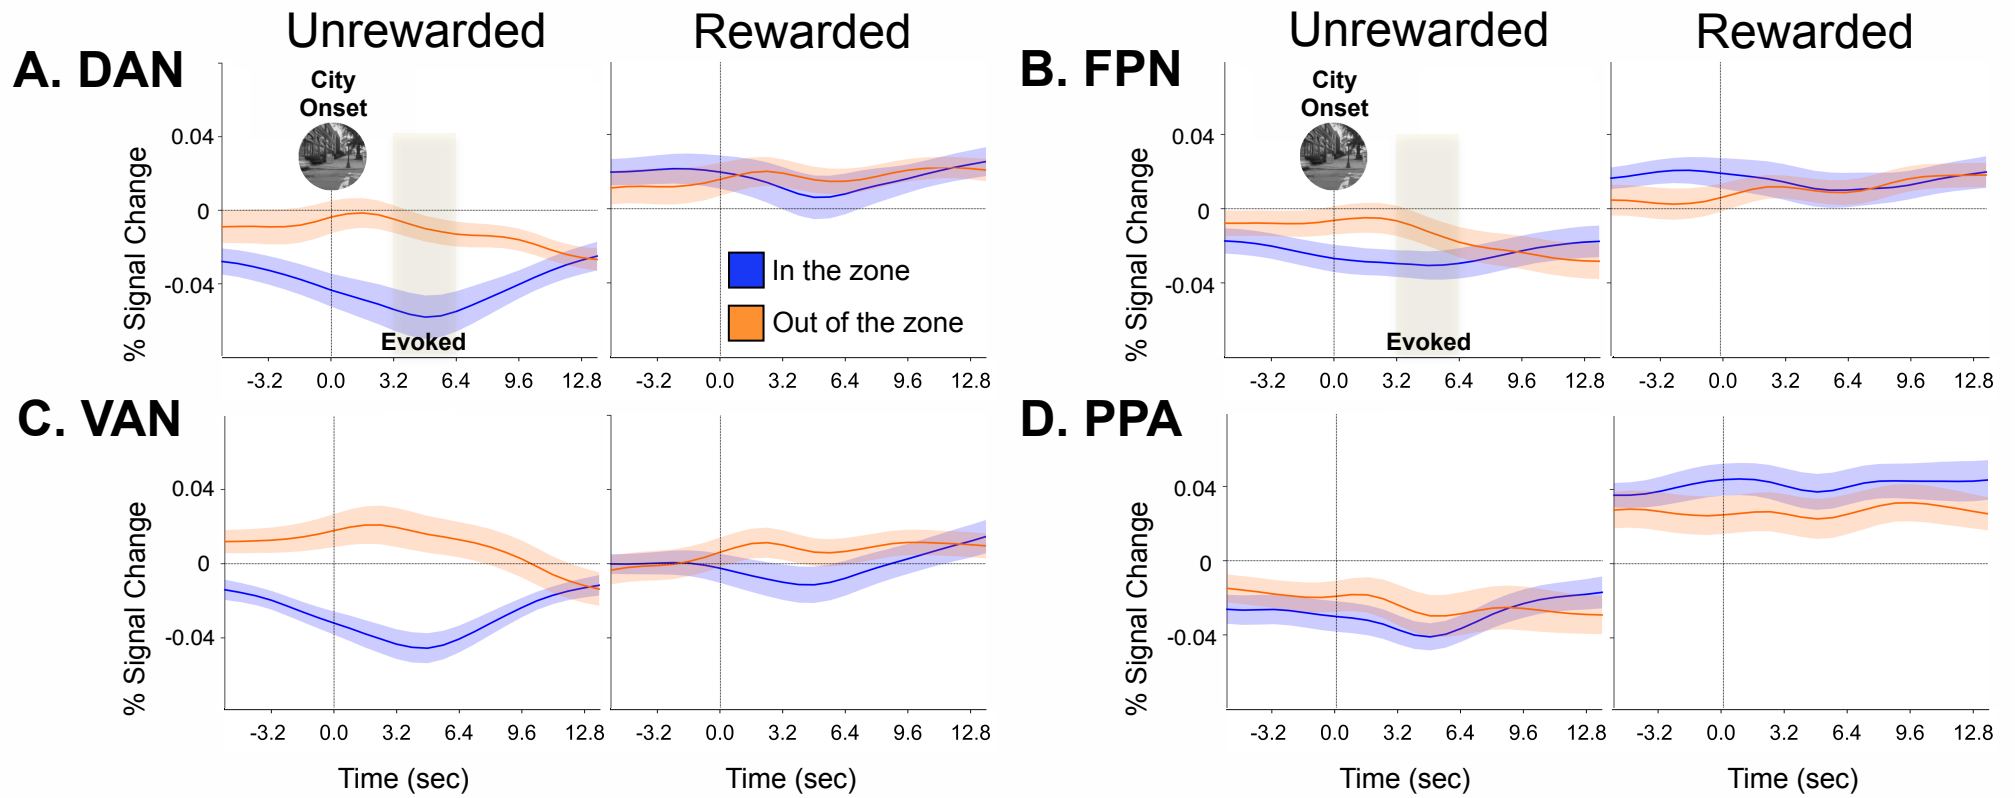

**Supplementary Figure 2.** Event-related time courses associated with high (orange; out of the zone) and low (blue; in the zone) RT variability during unrewarded and rewarded blocks. Time courses are expressed as percentage signal change from the mean and were averaged across individuals and voxels in task-positive ROIs which include (A) Dorsal attention network/DAN (B) Frontal-parietal network/FPN (C) Ventral attention network/VAN (D) Parahippocampal place area/PPA

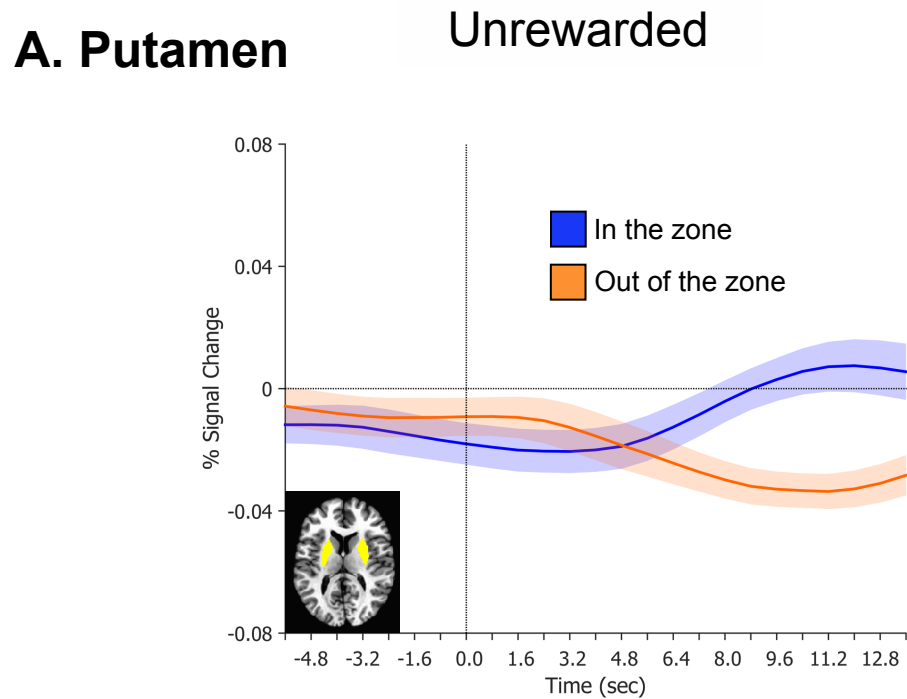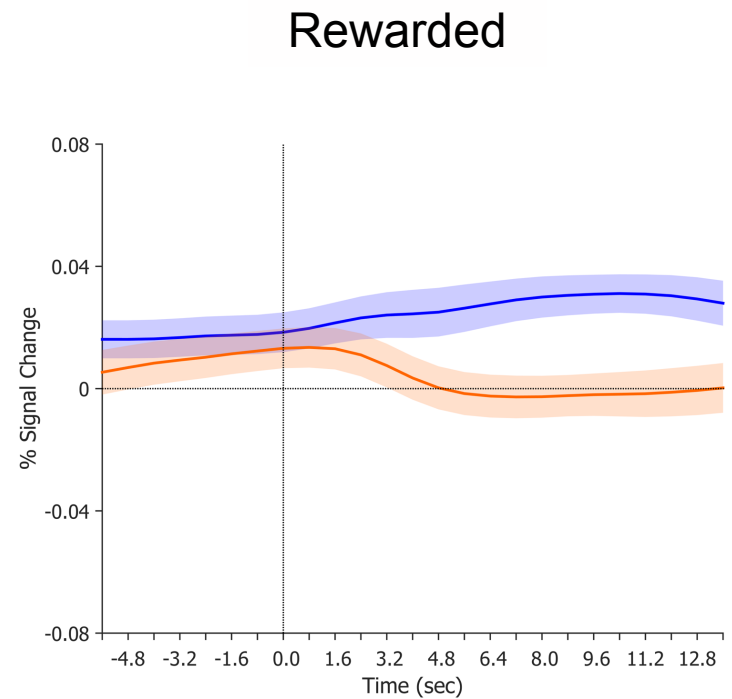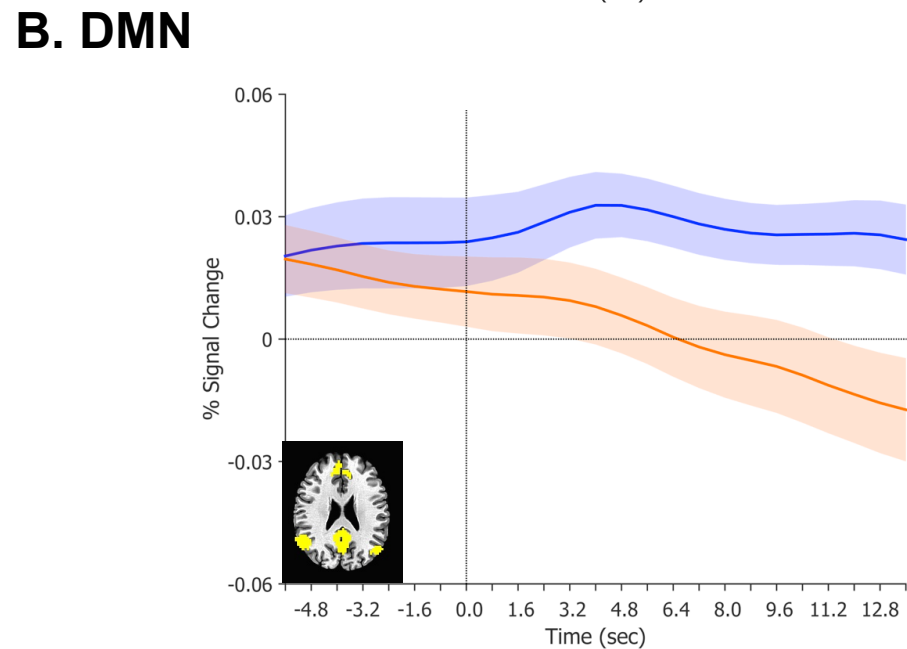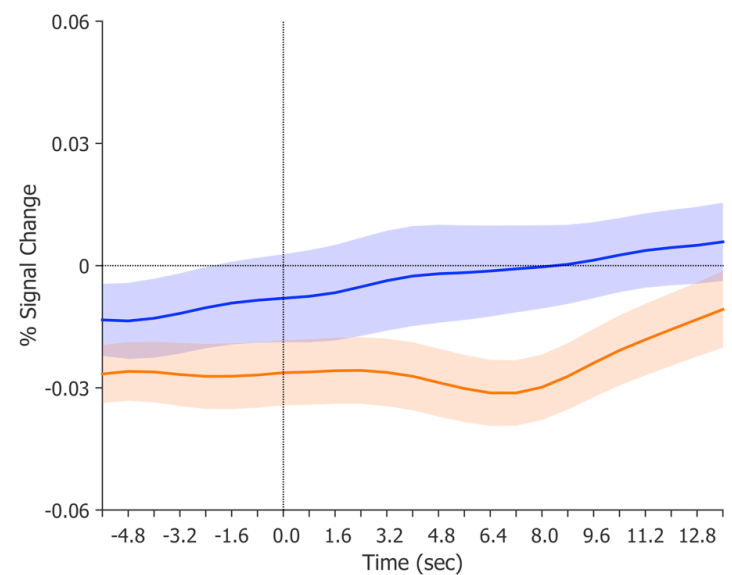

**Supplementary Figure 3.** Event-related time courses associated with high (orange; out of the zone) and low (blue; in the zone) RT variability during unrewarded and rewarded blocks. (A) Putamen (from Basal Ganglia Human Area Template, BGHAT; <http://lrnlab.org>) (B) Default mode network (Yeo et al., 2011)
